# Supplementary material for: Mn(C2O4)(H2O)0.25: an antiferromagnetic oxalato-based cage compound
Source: Royal Society of Chemistry journal article supplement (doi:10.1039/c1dt10346f), 2011-01-01
Supplement: c1dt10346f.pdf [file c1dt10346f.pdf]

Supporting Information of

**“Mn(C<sub>2</sub>O<sub>4</sub>)(H<sub>2</sub>O)<sub>0.25</sub>: An Antiferromagnetic Oxalate-based Cage Compound”**

By Zhang et al.,

*Synthesis:*

All reagents are commercially available and used as received without further purification unless otherwise stated. MnCl<sub>2</sub>·4H<sub>2</sub>O 1.0mmol, H<sub>2</sub>C<sub>2</sub>O<sub>4</sub>·2H<sub>2</sub>O 1.0mmol and 8.0ml 1,3-CH<sub>2</sub>OHCH<sub>2</sub>CHOHCH<sub>3</sub> were sealed in a Teflon-lined stainless steel vessel, heated to 120°C for 72 hours under autogenous pressure, and then cooled to room-temperature. The resulting pink crystals were collected and washed with methanol and then dried in the air at ambient temperature.

*Physical Characterizations:*

Element analysis of carbon and hydrogen were performed on an Elementar Vario EL analyzer. IR spectra were recorded on a Bio-rad FTS6000 spectrometer for KBr pellet. X-ray diffraction data was collected at 173K on Rigaku diffractometer with confused monochromated Mo K $\alpha$  ( $\lambda = 0.71073 \text{ \AA}$ ) radiation. The structure was solved by direct method and refined by full-matrix least-squares on  $F^2$  using SHELX program, with anisotropic thermal parameters for all non-hydrogen atoms. Hydrogen atoms of H<sub>2</sub>O were located by different Fourier map and refined with constrains for the ideal geometry. Powder X-ray diffraction pattern was obtained on a Rigaku RINT2000 diffractometer at room temperature with Cu K $\alpha$  ( $\lambda = 1.54056 \text{ \AA}$ ) radiation in a flat-plate geometry. Magnetization measurements were performed against tightly packed polycrystalline sample in capsule on a Quantum Design MPMS 7XL SQUID system. Susceptibility data were corrected for diamagnetism of sample by Pascal constants ( $-42.25 \times 10^{-6} \text{ cm}^3 \text{ mol}^{-1}$ ) and background by experimental measurement on the sample holder. The ac susceptibility measurement was carried out on a Quantum Design MPMS 5XL SQUID system for polycrystalline sample. Specific heat measurement was carried out on a Quantum Design PPMS 9XL system for polycrystalline sample fixed on sample holder by N-grease. The data was corrected for the contribution of N-grease and sample holder.

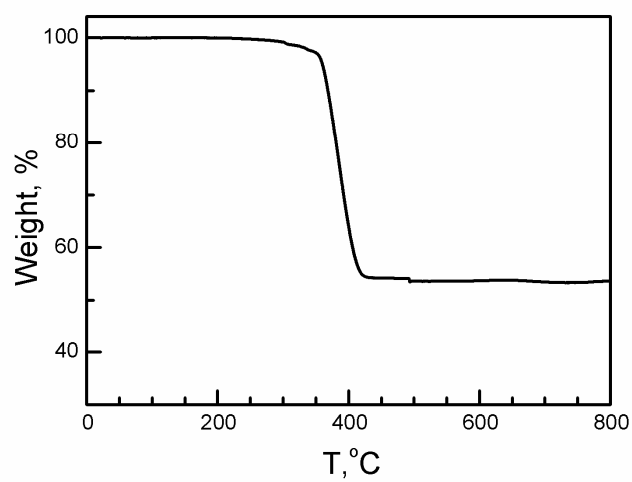

**Figure S1.** Thermogravimetric analysis plot of  $\text{Mn}(\text{C}_2\text{O}_4)(\text{H}_2\text{O})_{0.25}$  (black) measured at a heating rate of  $10\text{ }^\circ\text{C}/\text{min}$ .

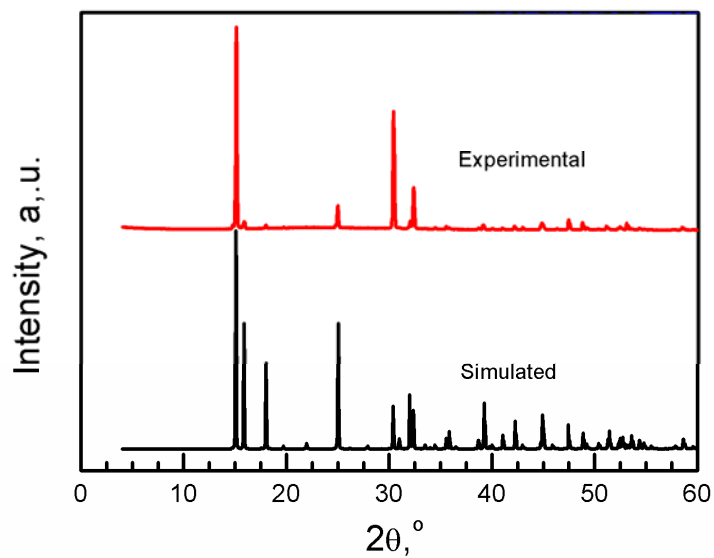

**Figure S2.** X-ray powder diffraction pattern. Black line: the simulated one based on the single crystal structure of  $\text{Mn}(\text{C}_2\text{O}_4)(\text{H}_2\text{O})_{0.25}$ ; red line: the experiment data from polycrystals.

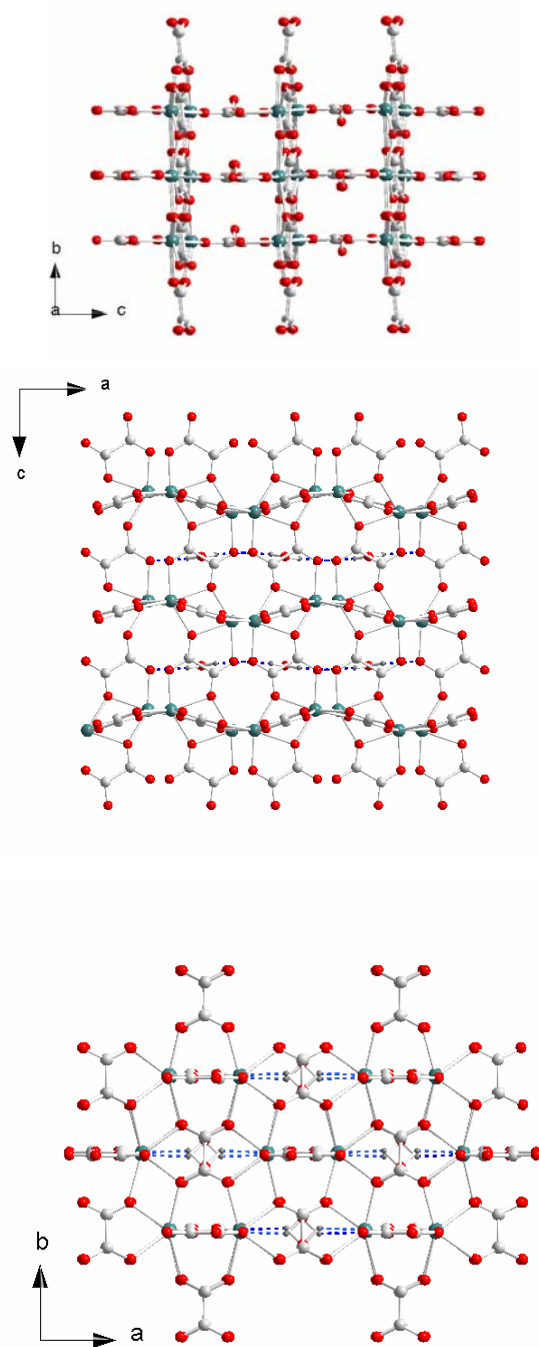

**Figure S3.** Crystal structure viewed along the *a*, *b*, and *c* axis. Color Code: Mn, green; C, grey; O, red; H, light grey. Dashed blue sticks are hydrogen bonds.

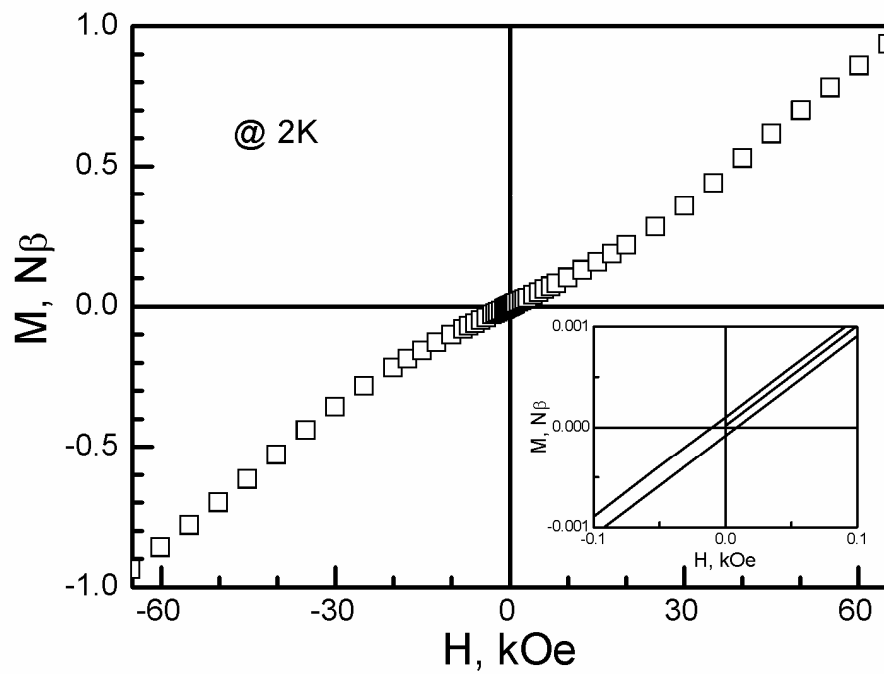

**Figure S4.** Isothermal magnetization of  $\text{Mn}(\text{C}_2\text{O}_4)(\text{H}_2\text{O})_{0.25}$  at 2 K. Inset: low-field of 100 Oe.
